# Supplementary material for: Expression of glutamine metabolism-related proteins in thyroid cancer
Source: PubMed Central journal article supplement (PMC5288210; doi:10.18632/oncotarget.10682), 2016-07-18
Supplement: oncotarget-07-53628-s001.pdf [file oncotarget-07-53628-s001.pdf]

## Expression of glutamine metabolism-related proteins in thyroid cancer

### SUPPLEMENTARY TABLES

Supplementary Table S1: Source, clone, and dilution of antibodies used in this study

| Antibody   | Clone      | Dilution | Company                  |
|------------|------------|----------|--------------------------|
| GLS1       | Polyclonal | 1:50     | Abcam, Cambridge, UK     |
| GDH        | Polyclonal | 1:100    | Abcam, Cambridge, UK     |
| ASCT2      | Polyclonal | 1:100    | Abcam, Cambridge, UK     |
| BRAF V600E | VE1        | 1:50     | Ventana, Tucson, AZ, USA |

GLS1; glutaminase 1, GDH; glutamate dehydrogenase, ASCT2; amino acid transporter-2

**Supplementary Table S2: Basal characteristics of patients with papillary thyroid carcinoma**

See Supplementary File 1

Supplementary Table S3: Basal characteristics of patients with follicular carcinoma (FC)

| Parameters         | Total<br>N=112 (%) | FC, minimally<br>invasive type<br>n=99 (%) | FC, widely invasive<br>type<br>n=13 (%) | p-value |
|--------------------|--------------------|--------------------------------------------|-----------------------------------------|---------|
| Age (years)        |                    |                                            |                                         | 0.255   |
| <45                | 51 (45.5)          | 47 (47.5)                                  | 4 (30.8)                                |         |
| ≥45                | 61 (54.5)          | 52 (52.5)                                  | 9 (69.2)                                |         |
| Sex                |                    |                                            |                                         | 0.233   |
| Male               | 28 (25.0)          | 23 (23.2)                                  | 5 (38.5)                                |         |
| Female             | 84 (75.0)          | 76 (76.8)                                  | 8 (61.5)                                |         |
| Tumor size (cm)    |                    |                                            |                                         | 0.040   |
| ≤2.0               | 34 (30.4)          | 34 (34.3)                                  | 0 (0.0)                                 |         |
| >2.0, ≤4.0         | 49 (43.8)          | 41 (41.4)                                  | 8 (61.5)                                |         |
| >4.0               | 29 (25.9)          | 24 (24.2)                                  | 5 (38.5)                                |         |
| Capsular invasion  |                    |                                            |                                         | 0.147   |
| No                 | 14 (12.5)          | 14 (14.1)                                  | 0 (0.0)                                 |         |
| Yes                | 98 (87.5)          | 85 (85.9)                                  | 13 (100.0)                              |         |
| Vascular invasion  |                    |                                            |                                         | 0.028   |
| No                 | 66 (58.9)          | 62 (62.6)                                  | 4 (30.8)                                |         |
| Yes                | 46 (41.1)          | 37 (37.4)                                  | 9 (69.2)                                |         |
| Tumor extension    |                    |                                            |                                         | <0.001  |
| Intrathyroidal     | 95 (84.8)          | 89 (89.9)                                  | 6 (46.2)                                |         |
| Extrathyroidal     | 17 (15.2)          | 10 (10.1)                                  | 7 (53.8)                                |         |
| LN metastasis      |                    |                                            |                                         | 0.220   |
| No                 | 110 (98.2)         | 98 (99.0)                                  | 12 (92.3)                               |         |
| Yes                | 2 (1.8)            | 1 (1.0)                                    | 1 (7.7)                                 |         |
| Distant metastasis |                    |                                            |                                         | 0.003   |
| No                 | 101 (90.2)         | 93 (93.9)                                  | 8 (61.5)                                |         |
| Yes                | 11 (9.8)           | 6 (6.1)                                    | 5 (38.5)                                |         |

**Supplementary Table S4: Basal characteristics of patients with medullary carcinoma (MC), poorly differentiated carcinoma (PDC), and anaplastic carcinoma (AC)**

| Parameters         | MC, n= 70 (%) | PDC, n= 23 (%) | AC, n= 8 (%) |
|--------------------|---------------|----------------|--------------|
| Age (years)        |               |                |              |
| <45                | 21 (30.0)     | 4 (17.4)       | 0 (0.0)      |
| ≥45                | 49 (70.0)     | 19 (82.6)      | 8 (100.0)    |
| Sex                |               |                |              |
| Male               | 22 (31.4)     | 10 (43.5)      | 1 (12.5)     |
| Female             | 48 (68.6)     | 13 (56.5)      | 7 (87.5)     |
| Tumor size (cm)    |               |                |              |
| ≤2.0               | 53 (75.7)     | 8 (34.8)       | 0 (0.0)      |
| >2.0, ≤4.0         | 14 (20.0)     | 9 (39.1)       | 1 (12.5)     |
| >4.0               | 3 (4.3)       | 6 (26.1)       | 7 (87.5)     |
| Tumor margin       |               |                |              |
| Infiltrative       | 45 (64.3)     | 17 (73.9)      | 8 (100.0)    |
| Expanding          | 25 (35.7)     | 6 (26.1)       | 0 (0.0)      |
| Tumor extension    |               |                |              |
| Intrathyroidal     | 52 (74.3)     | 11 (47.8)      | 0 (0.0)      |
| Extrathyroidal     | 18 (25.7)     | 12 (52.2)      | 8 (100.0)    |
| LN metastasis      |               |                |              |
| No                 | 47 (67.1)     | 22 (95.7)      | 4 (50.0)     |
| Yes                | 23 (32.9)     | 1 (4.3)        | 4 (50.0)     |
| Distant metastasis |               |                |              |
| No                 | 67 (95.7)     | 16 (69.6)      | 8 (100.0)    |
| Yes                | 3 (4.3)       | 7 (30.4)       | 0 (0.0)      |

Supplementary Table S5: Expression of glutamine metabolism-related proteins according to p53 status in PDC and AC

| Parameters | Total<br>N=31 (%) | PDC and AC               |                          | p-value |
|------------|-------------------|--------------------------|--------------------------|---------|
|            |                   | p53 negative<br>n=24 (%) | p53 positive*<br>n=7 (%) |         |
| GLS1 (T)   |                   |                          |                          | 0.054   |
| Negative   | 9 (29.0)          | 9 (37.5)                 | 0 (0.0)                  |         |
| Positive   | 22 (71.0)         | 15 (62.5)                | 7 (100.0)                |         |
| GLS1 (S)   |                   |                          |                          | 0.055   |
| Negative   | 28 (90.3)         | 23 (95.8)                | 5 (71.4)                 |         |
| Positive   | 3 (9.7)           | 1 (4.2)                  | 2 (28.6)                 |         |
| GDH (T)    |                   |                          |                          | 0.325   |
| Negative   | 3 (9.7)           | 3 (12.5)                 | 0 (0.0)                  |         |
| Positive   | 28 (90.3)         | 21 (87.5)                | 7 (100.0)                |         |
| GDH (S)    |                   |                          |                          | 0.029   |
| Negative   | 26 (83.9)         | 22 (91.7)                | 4 (57.1)                 |         |
| Positive   | 5 (16.1)          | 2 (8.3)                  | 3 (42.9)                 |         |
| ASCT2 (T)  |                   |                          |                          | 0.551   |
| Negative   | 24 (77.4)         | 18 (75.0)                | 6 (85.7)                 |         |
| Positive   | 7 (22.6)          | 6 (25.0)                 | 1 (14.3)                 |         |

\* p53 positivity defined as expression of more than 5% in tumor cells. PDC; poorly differentiated carcinoma, AC; anaplastic carcinoma
